# Supplementary material for: Who is eligible for randomized trials? A comparison between the exclusion criteria defined by the ISCHEMIA trial and 3102 real-world patients with stable coronary artery disease undergoing stent implantation in a single cardiology center
Source: PubMed Central journal article supplement (PMC4570660; doi:10.1186/s13063-015-0934-4), 2015-09-15
Supplement: 13063_2015_934_MOESM1_ESM.pdf [file 13063_2015_934_MOESM1_ESM.pdf]

## Independent predictors of mortality in analyzed group.

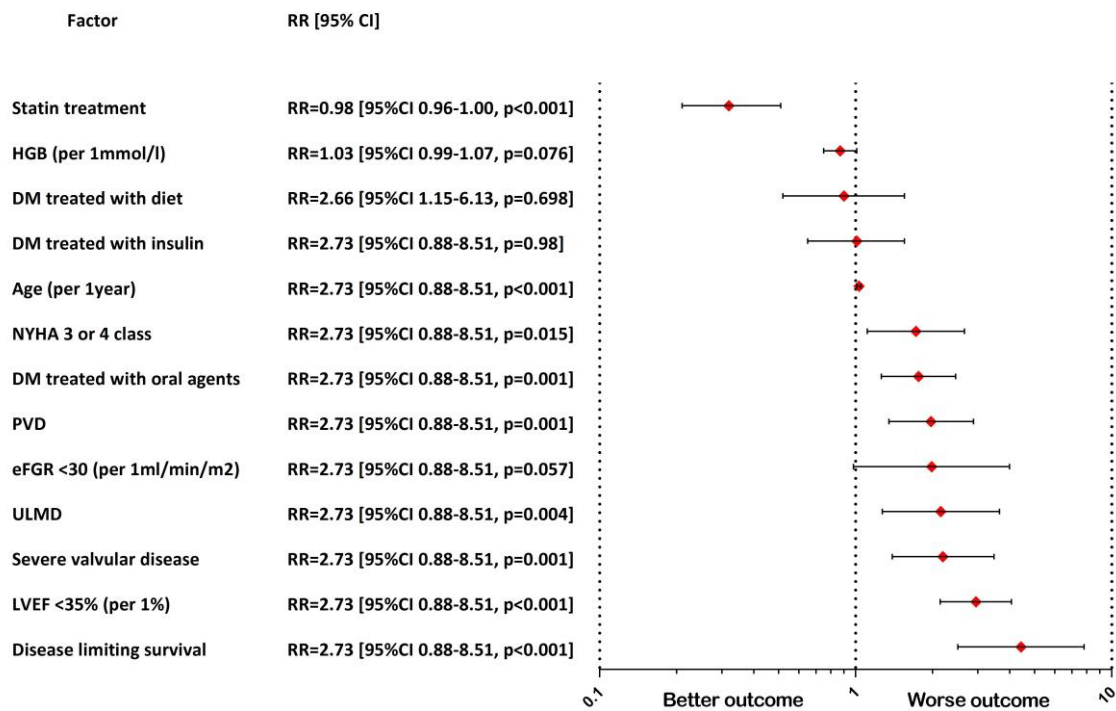

HGB – hemoglobin; DM – diabetes mellitus; NYHA – New York Heart Association class; PVD – peripheral vessel disease; eGFR – estimated Glomerular Filtration Rate; ULMD – unprotected Left Main disease; LVEF – left ventricle ejection fraction.
